# Supplementary material for: Hexavalent Chromium Inhibited Zebrafish Embryo Development by Altering Apoptosis- and Antioxidant-Related Genes
Source: MDPI journal article supplement (doi:10.3390/cimb45080436), 2023-08-18

## Supplementary data

### 1. Survival rate of zebrafish embryo

The number of embryo at day 1

| No. | Chromium concentration ( $\mu\text{g/L}$ ) |     |     |       |      |      |    |    |     |
|-----|--------------------------------------------|-----|-----|-------|------|------|----|----|-----|
|     | Control                                    | 0.1 | 1   | 3.125 | 6.25 | 12.5 | 25 | 50 | 100 |
| 1   | 100                                        | 100 | 100 | 94    | 94   | 92   | 92 | 88 | 84  |
| 2   | 100                                        | 100 | 98  | 96    | 88   | 92   | 92 | 90 | 88  |
| 3   | 100                                        | 100 | 96  | 94    | 96   | 92   | 92 | 80 | 94  |
| 4   | 100                                        | 100 | 94  | 96    | 98   | 88   | 90 | 80 | 82  |
| 5   | 100                                        | 100 | 98  | 98    | 98   | 94   | 86 | 94 | 98  |

The number of embryo in day 2

| No. | Chromium concentration ( $\mu\text{g/L}$ ) |      |    |       |      |      |    |    |     |
|-----|--------------------------------------------|------|----|-------|------|------|----|----|-----|
|     | Control                                    | 0.1  | 1  | 3.125 | 6.25 | 12.5 | 25 | 50 | 100 |
| 1   | 100                                        | 94.0 | 98 | 88    | 90   | 88   | 42 | 68 | 84  |
| 2   | 100                                        | 100  | 98 | 90    | 76   | 90   | 52 | 84 | 88  |
| 3   | 100                                        | 100  | 96 | 90    | 94   | 86   | 54 | 22 | 84  |
| 4   | 100                                        | 100  | 94 | 92    | 96   | 84   | 42 | 36 | 78  |
| 5   | 100                                        | 100  | 96 | 96    | 92   | 94   | 46 | 66 | 96  |

The number of embryo at day 3

| No. | Chromium concentration ( $\mu\text{g/L}$ ) |     |    |       |      |      |    |    |     |
|-----|--------------------------------------------|-----|----|-------|------|------|----|----|-----|
|     | Control                                    | 0.1 | 1  | 3.125 | 6.25 | 12.5 | 25 | 50 | 100 |
| 1   | 100                                        | 94  | 98 | 88    | 84   | 88   | 40 | 58 | 0   |
| 2   | 100                                        | 100 | 98 | 90    | 72   | 90   | 52 | 60 | 0   |
| 3   | 100                                        | 100 | 96 | 90    | 94   | 86   | 52 | 12 | 0   |
| 4   | 100                                        | 100 | 94 | 92    | 96   | 84   | 40 | 16 | 0   |
| 5   | 100                                        | 100 | 96 | 96    | 92   | 94   | 46 | 4  | 0   |

The number of embryo at day 4

| No. | Chromium concentration ( $\mu\text{g/L}$ ) |     |    |       |      |      |    |    |     |
|-----|--------------------------------------------|-----|----|-------|------|------|----|----|-----|
|     | Control                                    | 0.1 | 1  | 3.125 | 6.25 | 12.5 | 25 | 50 | 100 |
| 1   | 100                                        | 94  | 98 | 88    | 80   | 86   | 36 | 0  | 0   |
| 2   | 100                                        | 100 | 98 | 84    | 72   | 88   | 46 | 0  | 0   |
| 3   | 100                                        | 100 | 96 | 80    | 80   | 82   | 48 | 0  | 0   |
| 4   | 100                                        | 100 | 94 | 72    | 72   | 78   | 34 | 0  | 0   |
| 5   | 100                                        | 100 | 96 | 78    | 78   | 90   | 38 | 0  | 0   |

The number of embryo at day 5

| No. | Chromium concentration ( $\mu\text{g/L}$ ) |     |    |       |      |      |    |    |     |
|-----|--------------------------------------------|-----|----|-------|------|------|----|----|-----|
|     | Control                                    | 0.1 | 1  | 3.125 | 6.25 | 12.5 | 25 | 50 | 100 |
| 1   | 100                                        | 94  | 98 | 88    | 80   | 86   | 28 | 0  | 0   |
| 2   | 100                                        | 100 | 98 | 84    | 72   | 84   | 38 | 0  | 0   |

|   |     |     |    |    |    |    |    |   |   |
|---|-----|-----|----|----|----|----|----|---|---|
| 3 | 100 | 100 | 96 | 80 | 80 | 78 | 40 | 0 | 0 |
| 4 | 100 | 100 | 94 | 72 | 72 | 66 | 30 | 0 | 0 |
| 5 | 100 | 100 | 96 | 78 | 78 | 90 | 18 | 0 | 0 |

The number of embryo at day 6

| No. | Chromium concentration (µg/L) |     |    |       |      |      |    |    |     |
|-----|-------------------------------|-----|----|-------|------|------|----|----|-----|
|     | Control                       | 0.1 | 1  | 3.125 | 6.25 | 12.5 | 25 | 50 | 100 |
| 1   | 100                           | 94  | 98 | 88    | 78   | 76   | 28 | 0  | 0   |
| 2   | 100                           | 100 | 98 | 76    | 72   | 72   | 38 | 0  | 0   |
| 3   | 100                           | 100 | 96 | 80    | 80   | 48   | 38 | 0  | 0   |
| 4   | 100                           | 100 | 94 | 72    | 72   | 32   | 30 | 0  | 0   |
| 5   | 100                           | 100 | 96 | 78    | 76   | 46   | 18 | 0  | 0   |

The number of embryo at day 7

| No. | Chromium concentration (µg/L) |     |    |       |      |      |    |    |     |
|-----|-------------------------------|-----|----|-------|------|------|----|----|-----|
|     | Control                       | 0.1 | 1  | 3.125 | 6.25 | 12.5 | 25 | 50 | 100 |
| 1   | 100                           | 94  | 98 | 88    | 78   | 76   | 28 | 0  | 0   |
| 2   | 100                           | 100 | 98 | 76    | 72   | 72   | 38 | 0  | 0   |
| 3   | 100                           | 100 | 96 | 80    | 80   | 48   | 38 | 0  | 0   |
| 4   | 100                           | 100 | 94 | 72    | 72   | 32   | 30 | 0  | 0   |
| 5   | 100                           | 100 | 96 | 78    | 76   | 46   | 18 | 0  | 0   |

## 2. The body length of zebrafish larva

The body length of zebrafish larva ( $\mu\text{m}$ ) at Day 3

| No. | Chromium concentration ( $\mu\text{g/L}$ ) |      |      |       |      |      |              |
|-----|--------------------------------------------|------|------|-------|------|------|--------------|
|     | Control                                    | 0.1  | 1    | 3.125 | 6.25 | 12.5 | 25           |
| 1   | 2974                                       | 2933 | 3039 | 2921  | 2918 | 2731 | not hatching |
| 2   | 2969                                       | 2922 | 2842 | 2927  | 2915 | 2737 | not hatching |
| 3   | 2987                                       | 2988 | 2994 | 2857  | 2842 | 2844 | not hatching |
| 4   | 2978                                       | 2973 | 2874 | 2872  | 2915 | 2914 | not hatching |
| 5   | 3005                                       | 2956 | 2969 | 2932  | 2821 | 2803 | not hatching |

The body length of zebrafish larva ( $\mu\text{m}$ ) at Day 4

| No. | Chromium concentration ( $\mu\text{g/L}$ ) |      |      |       |      |      |              |
|-----|--------------------------------------------|------|------|-------|------|------|--------------|
|     | Control                                    | 0.1  | 1    | 3.125 | 6.25 | 12.5 | 25           |
| 1   | 3185                                       | 3134 | 3092 | 3215  | 2964 | 2955 | not hatching |
| 2   | 3176                                       | 3081 | 3172 | 3161  | 3122 | 2847 | not hatching |
| 3   | 3188                                       | 3275 | 3147 | 2998  | 3000 | 3009 | not hatching |
| 4   | 3164                                       | 3163 | 3056 | 3064  | 2920 | 3013 | not hatching |
| 5   | 3146                                       | 3139 | 3167 | 3066  | 3022 | 3083 | not hatching |

The body length of zebrafish larva ( $\mu\text{m}$ ) at Day 5

| No. | Chromium concentration ( $\mu\text{g/L}$ ) |      |      |       |      |      |      |
|-----|--------------------------------------------|------|------|-------|------|------|------|
|     | Control                                    | 0.1  | 1    | 3.125 | 6.25 | 12.5 | 25   |
| 1   | 3283                                       | 3229 | 3111 | 3077  | 3135 | 2906 | 2987 |
| 2   | 3246                                       | 3200 | 3323 | 3007  | 3105 | 3013 | 2923 |
| 3   | 3223                                       | 3196 | 3231 | 3311  | 3122 | 3207 | 2906 |
| 4   | 3253                                       | 3273 | 3301 | 3222  | 3158 | 3139 | 2859 |
| 5   | 3218                                       | 3257 | 3129 | 3247  | 3135 | 2925 | 2816 |

The body length of zebrafish larva ( $\mu\text{m}$ ) at Day 6

| No. | Chromium concentration ( $\mu\text{g/L}$ ) |      |      |       |      |      |      |
|-----|--------------------------------------------|------|------|-------|------|------|------|
|     | Control                                    | 0.1  | 1    | 3.125 | 6.25 | 12.5 | 25   |
| 1   | 3371                                       | 3270 | 3212 | 3191  | 3156 | 3081 | 2964 |
| 2   | 3336                                       | 3339 | 3246 | 3203  | 3157 | 3092 | 2920 |
| 3   | 3328                                       | 3188 | 3239 | 3203  | 3152 | 3056 | 2955 |
| 4   | 3340                                       | 3302 | 3203 | 3179  | 3158 | 3064 | 3009 |
| 5   | 3292                                       | 3223 | 3275 | 3138  | 3077 | 3066 | 3013 |

The body length of zebrafish larva ( $\mu\text{m}$ ) at Day 7

| No. | Chromium concentration ( $\mu\text{g/L}$ ) |      |      |       |      |      |      |
|-----|--------------------------------------------|------|------|-------|------|------|------|
|     | Control                                    | 0.1  | 1    | 3.125 | 6.25 | 12.5 | 25   |
| 1   | 3490                                       | 3336 | 3294 | 3215  | 3167 | 3077 | 3049 |
| 2   | 3500                                       | 3328 | 3264 | 3269  | 3156 | 3148 | 2973 |

|   |      |      |      |      |      |      |      |
|---|------|------|------|------|------|------|------|
| 3 | 3470 | 3340 | 3239 | 3207 | 3157 | 3077 | 2989 |
| 4 | 3475 | 3393 | 3269 | 3224 | 3152 | 3148 | 2973 |
| 5 | 3371 | 3314 | 3212 | 3214 | 3158 | 3184 | 2994 |

### 3. Heart rate

The heart rate (beats per minute) at Day 3

| No. | Chromium concentration ( $\mu\text{g/L}$ ) |     |     |       |      |      |     |
|-----|--------------------------------------------|-----|-----|-------|------|------|-----|
|     | Control                                    | 0.1 | 1   | 3.125 | 6.25 | 12.5 | 25  |
| 1   | 233                                        | 255 | 266 | 270   | 278  | 280  | 300 |
| 2   | 226                                        | 253 | 263 | 266   | 284  | 290  | 303 |
| 3   | 220                                        | 250 | 270 | 275   | 275  | 290  | 302 |
| 4   | 230                                        | 246 | 246 | 256   | 276  | 280  | 300 |
| 5   | 244                                        | 252 | 262 | 262   | 275  | 280  | 300 |

The heart rate (beats per minute) at Day 4

| No. | Chromium concentration ( $\mu\text{g/L}$ ) |     |     |       |      |      |     |
|-----|--------------------------------------------|-----|-----|-------|------|------|-----|
|     | Control                                    | 0.1 | 1   | 3.125 | 6.25 | 12.5 | 25  |
| 1   | 280                                        | 297 | 297 | 300   | 330  | 370  | 389 |
| 2   | 278                                        | 300 | 298 | 305   | 330  | 380  | 390 |
| 3   | 268                                        | 302 | 306 | 310   | 328  | 384  | 405 |
| 4   | 272                                        | 304 | 314 | 320   | 326  | 382  | 403 |
| 5   | 276                                        | 295 | 305 | 310   | 328  | 385  | 395 |

The heart rate (beats per minute) at Day 5

| No. | Chromium concentration ( $\mu\text{g/L}$ ) |     |     |       |      |      |     |
|-----|--------------------------------------------|-----|-----|-------|------|------|-----|
|     | Control                                    | 0.1 | 1   | 3.125 | 6.25 | 12.5 | 25  |
| 1   | 255                                        | 260 | 270 | 276   | 278  | 360  | 370 |
| 2   | 240                                        | 262 | 266 | 270   | 286  | 340  | 360 |
| 3   | 244                                        | 266 | 259 | 265   | 266  | 345  | 350 |
| 4   | 256                                        | 256 | 256 | 260   | 265  | 344  | 348 |
| 5   | 233                                        | 258 | 258 | 268   | 271  | 348  | 350 |

The heart rate (beats per minute) at Day 6

| No. | Chromium concentration ( $\mu\text{g/L}$ ) |     |     |       |      |      |     |
|-----|--------------------------------------------|-----|-----|-------|------|------|-----|
|     | Control                                    | 0.1 | 1   | 3.125 | 6.25 | 12.5 | 25  |
| 1   | 226                                        | 242 | 264 | 270   | 270  | 279  | 290 |
| 2   | 220                                        | 256 | 258 | 260   | 267  | 270  | 280 |
| 3   | 237                                        | 263 | 248 | 255   | 257  | 260  | 280 |
| 4   | 230                                        | 250 | 244 | 254   | 257  | 260  | 285 |
| 5   | 224                                        | 247 | 247 | 257   | 260  | 275  | 290 |

The heart rate (beats per minute) at Day 7

| No. | Chromium concentration ( $\mu\text{g/L}$ ) |     |     |       |      |      |     |
|-----|--------------------------------------------|-----|-----|-------|------|------|-----|
|     | Control                                    | 0.1 | 1   | 3.125 | 6.25 | 12.5 | 25  |
| 1   | 211                                        | 232 | 230 | 240   | 250  | 260  | 270 |
| 2   | 216                                        | 222 | 234 | 244   | 255  | 260  | 270 |

|   |     |     |     |     |     |     |     |
|---|-----|-----|-----|-----|-----|-----|-----|
| 3 | 219 | 238 | 244 | 245 | 255 | 260 | 270 |
| 4 | 224 | 228 | 228 | 230 | 240 | 250 | 270 |
| 5 | 220 | 223 | 233 | 235 | 245 | 250 | 260 |

#### 4. Western blot

##### 4.1. The protein exposure at day 1

##### 4.1.1. Caspase3

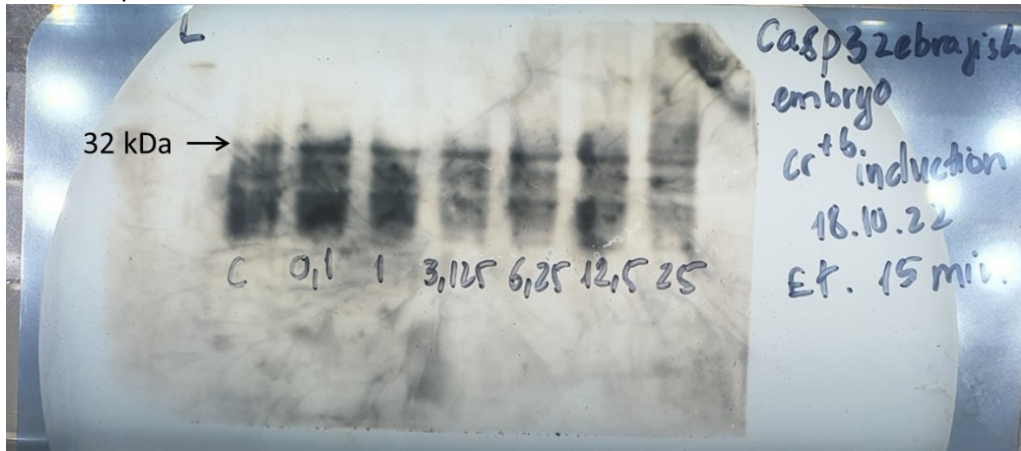

##### 4.1.2. Bcl2

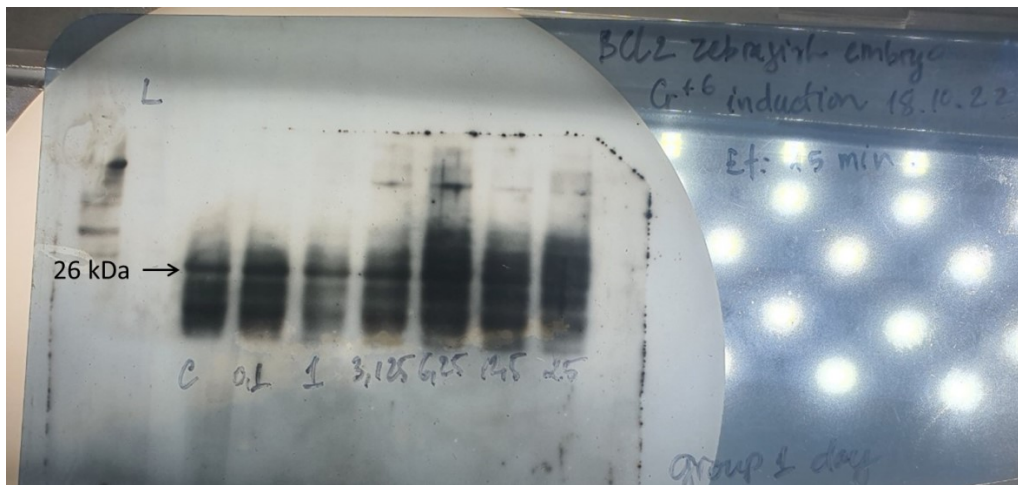

##### 4.1.3. Bax

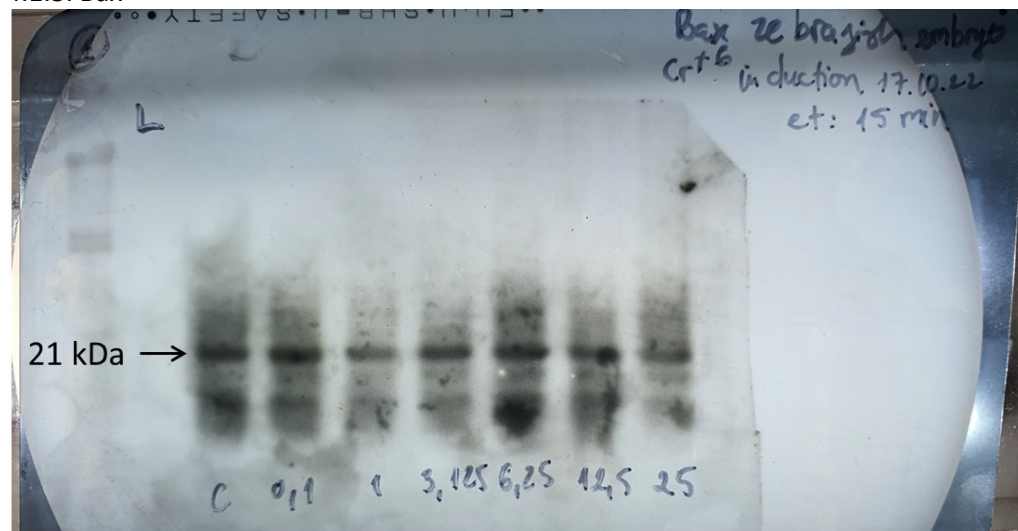

#### 4.1.4. Gapdh

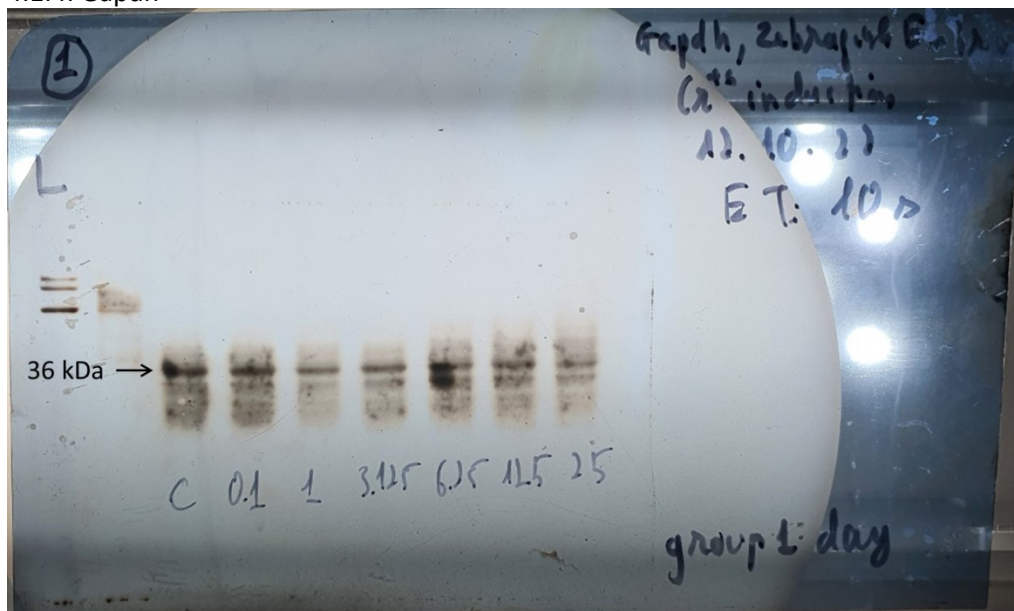

#### 4.2. The protein exposure at day 3

##### 4.2.1. Caspase3

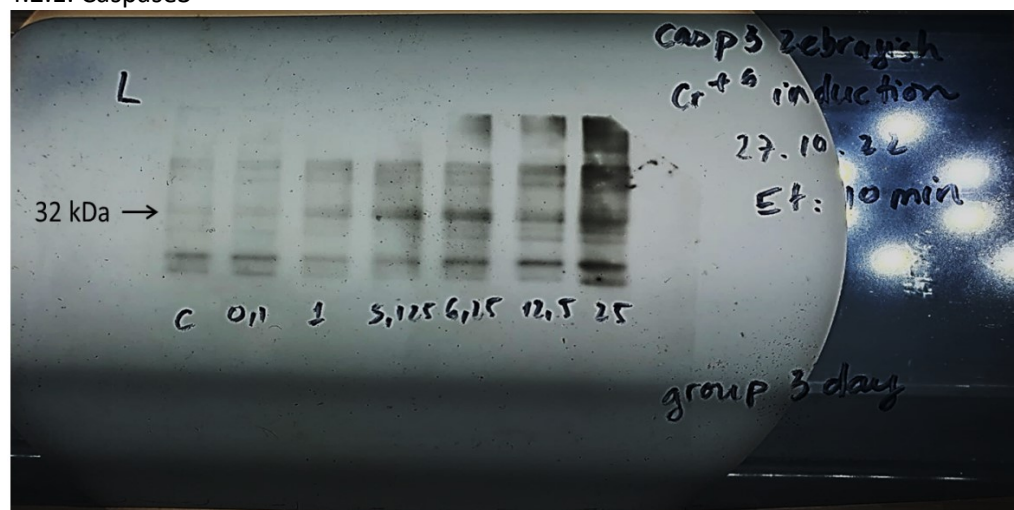

#### 4.2.2. Bcl2

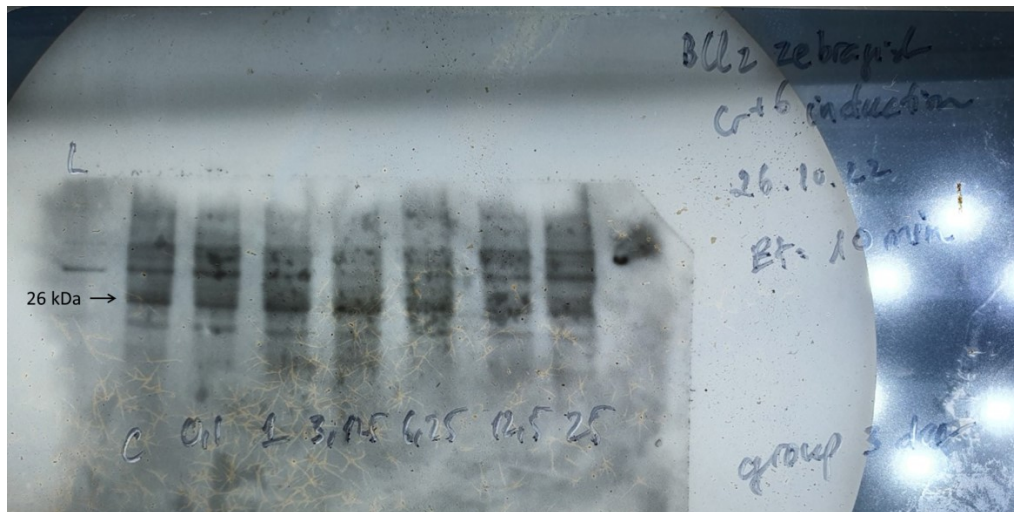

#### 4.2.3. Bax

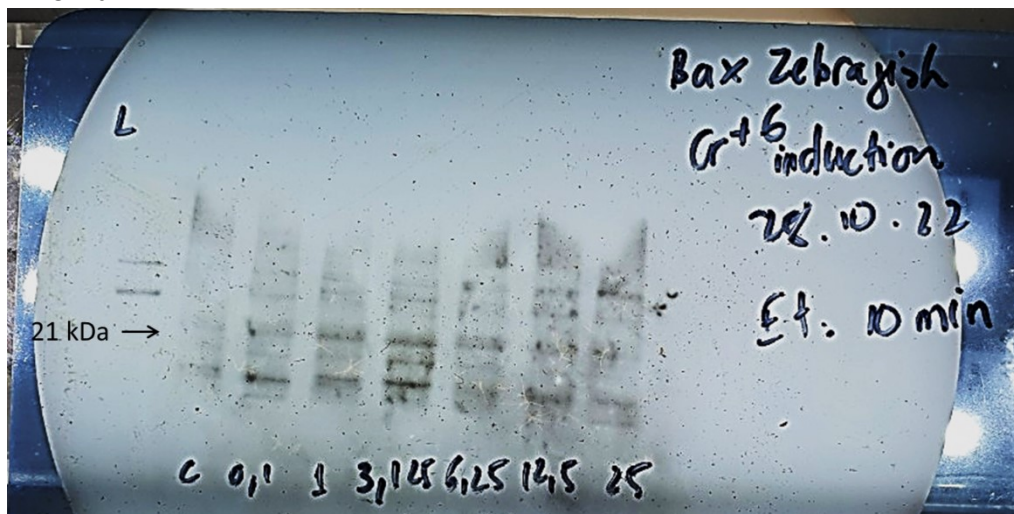

#### 4.2.4. Gapdh

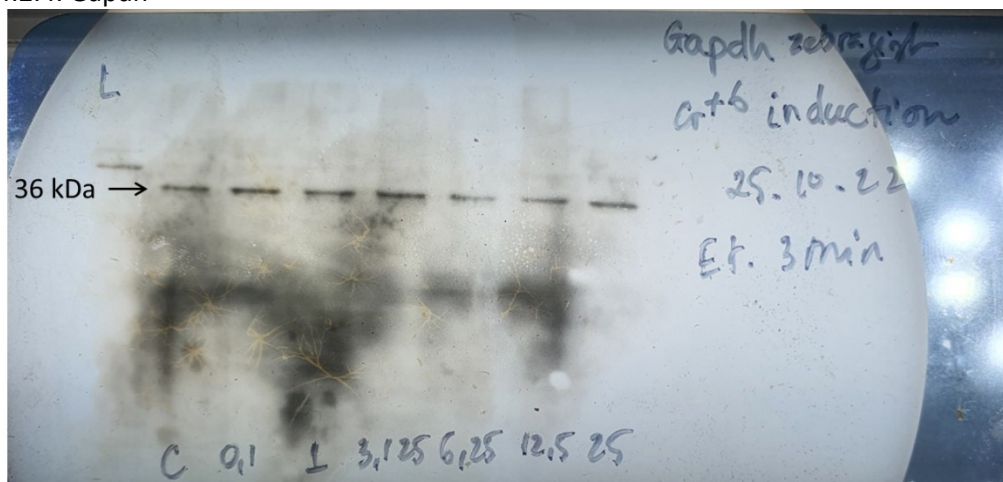

Supplement: s1 [file s1]
